# Supplementary material for: Genome-wide repeat dynamics reflect phylogenetic distance in closely related allotetraploid Nicotiana (Solanaceae)
Source: PubMed Central journal article supplement (PMC6961477; doi:10.1007/s00606-016-1356-9), 2016-11-01

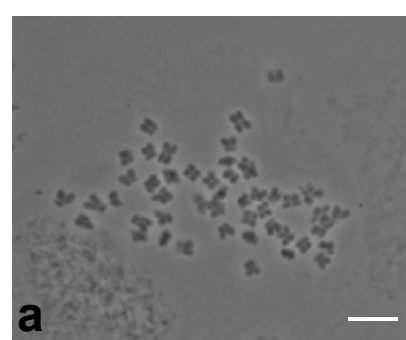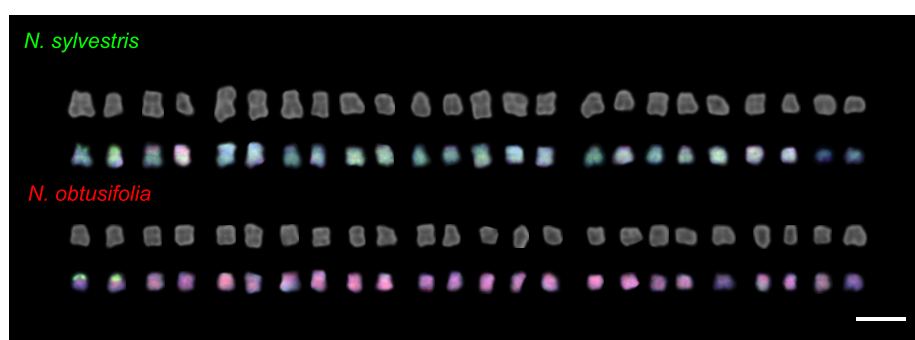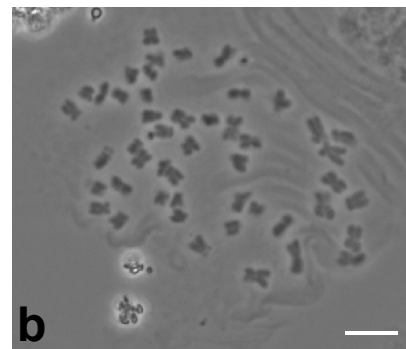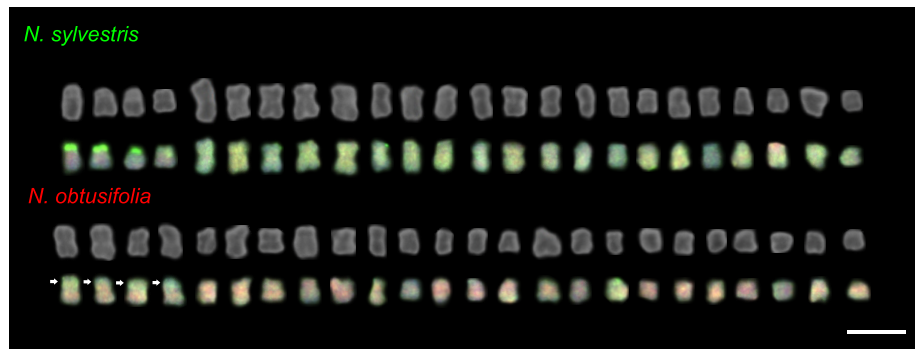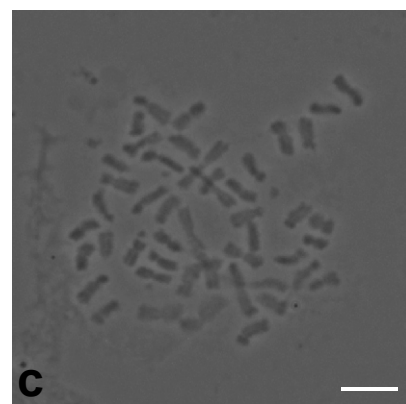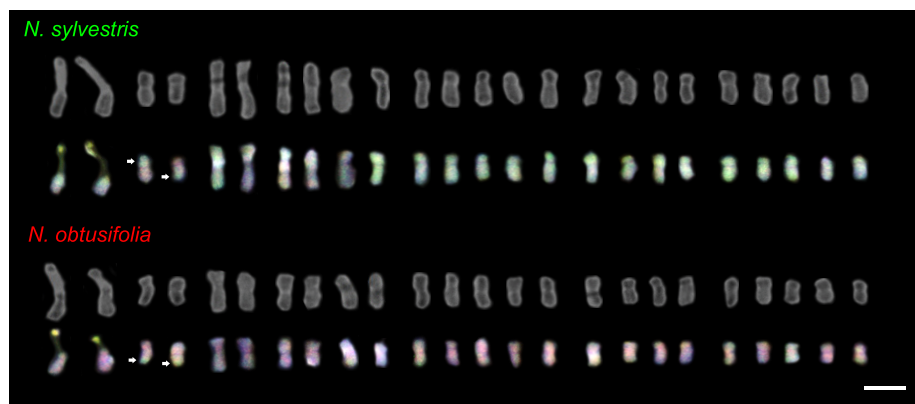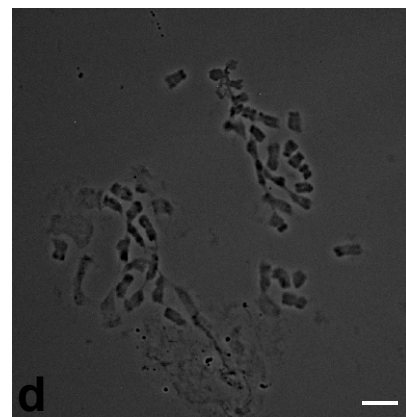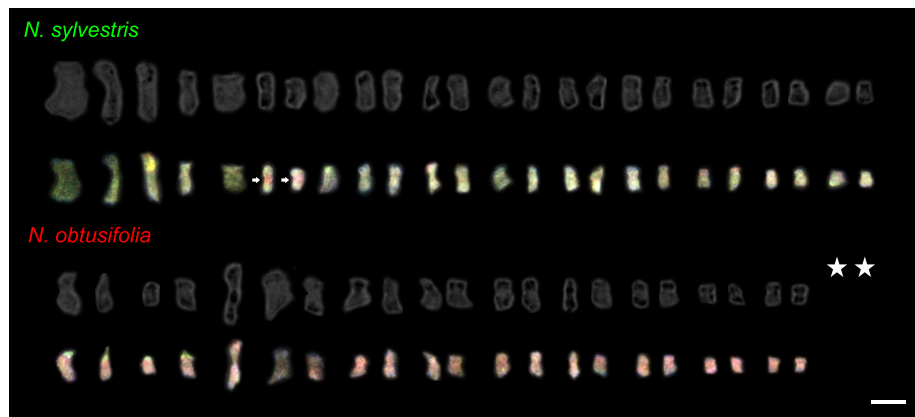

Supplement: 606_2016_1356_MOESM1_ESM.pdf [file 606_2016_1356_MOESM1_ESM.pdf]
